# Supplementary material for: Design, Synthesis and Biological Evaluation of Brain-Targeted Thiamine Disulfide Prodrugs of Ampakine Compound LCX001
Source: PubMed Central journal article supplement (PMC6274124; doi:10.3390/molecules21040488), 2016-04-14
Supplement: molecules-21-00488-s001.pdf [file molecules-21-00488-s001.pdf]

# Supplementary Materials: Design, Synthesis and Biological Evaluation of Brain-Targeted Thiamine Disulfide Prodrugs of Ampakine Compound LCX001

Dian Xiao, Fan-Hua Meng, Wei Dai, Zheng Yong, Jin-Qiu Liu, Xin-Bo Zhou and Song Li

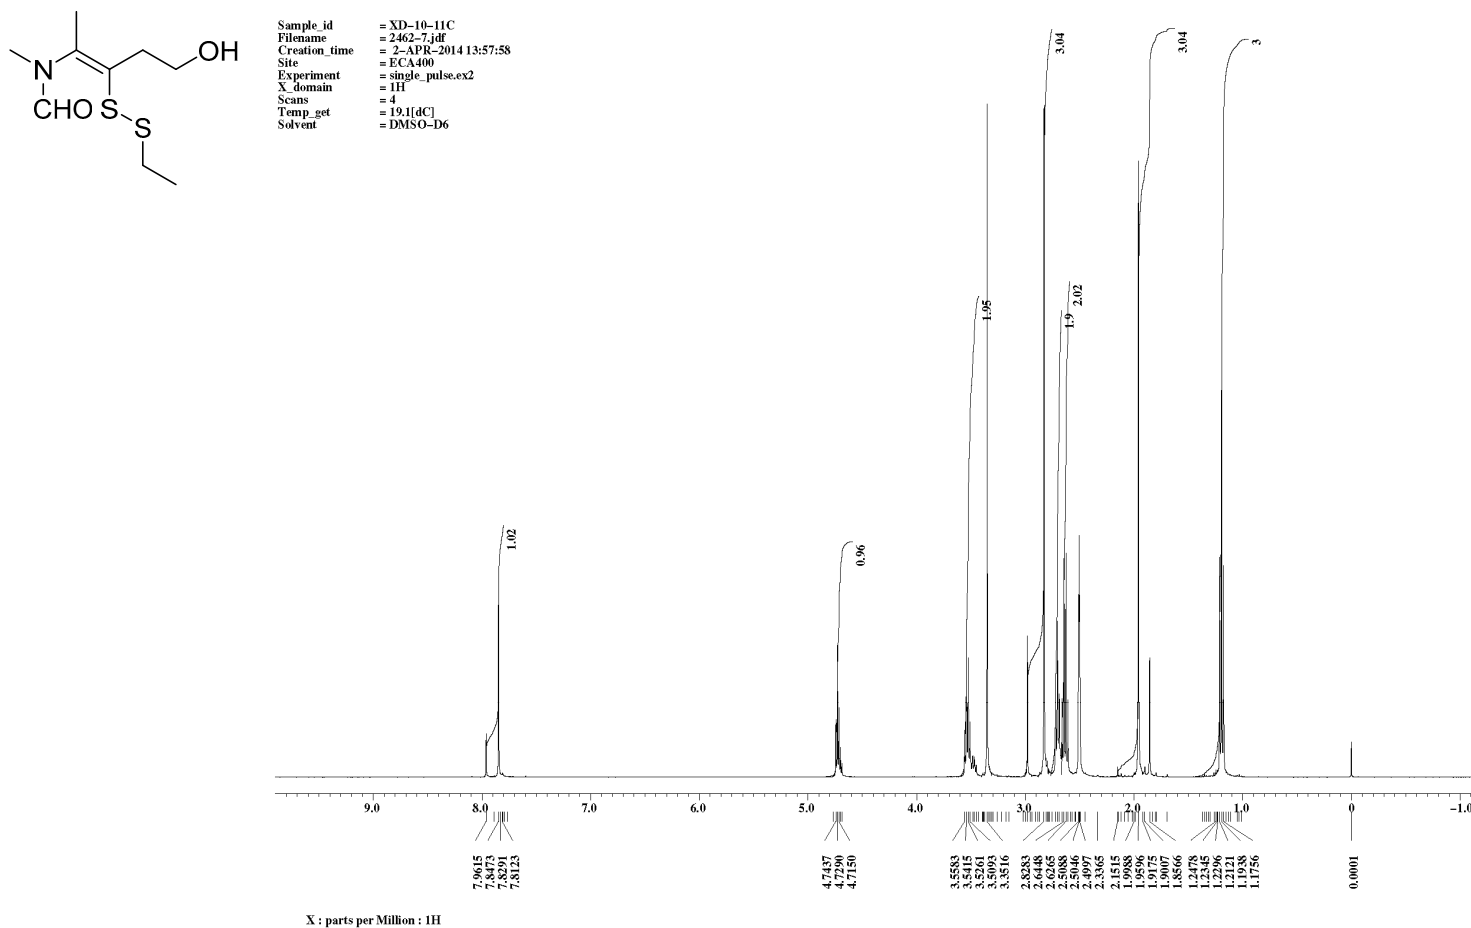

**Figure S1.**  $^1\text{H-NMR}$  spectra of *N*-(3-(ethyl-disulfanyl)-5-hydroxypent-2-en-2-yl)-*N*-methylformamide 5a ( $\text{CDCl}_3$ , 400MHz).

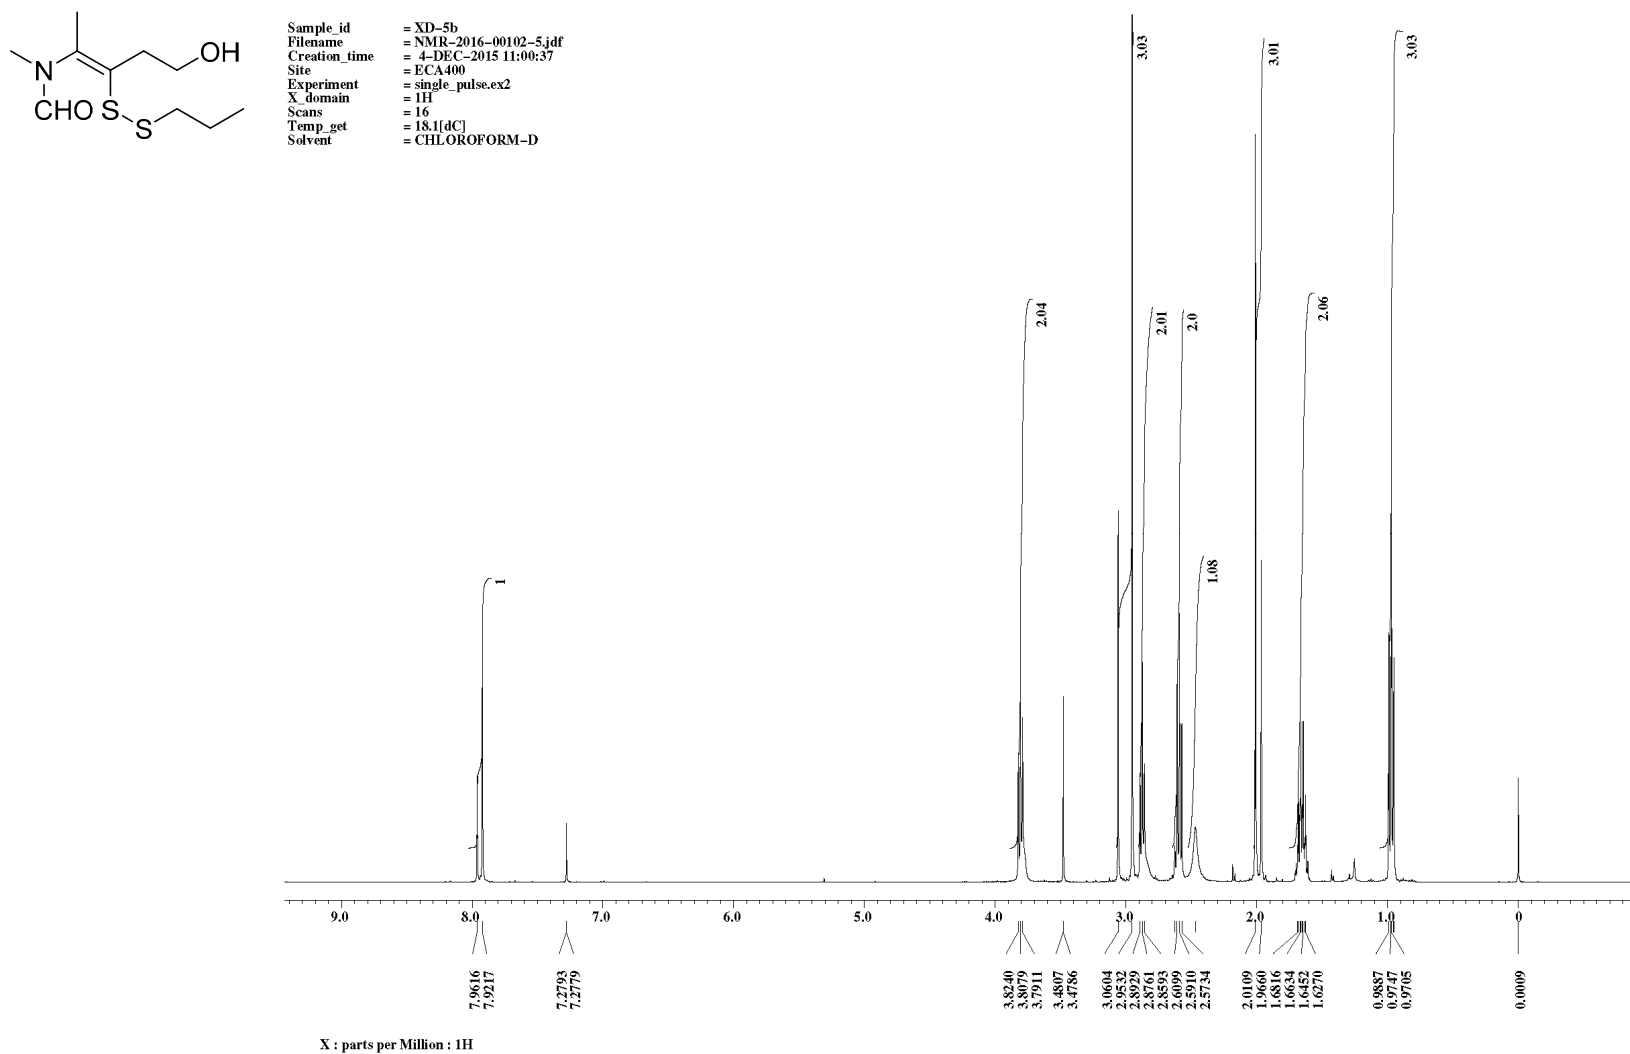

Figure S2.  $^1\text{H-NMR}$  spectra of *N*-(3-(propyldisulfanyl)-5-hydroxypent-2-en-2-yl)-*N*-methylformamide 5b ( $\text{CDCl}_3$ , 400MHz).

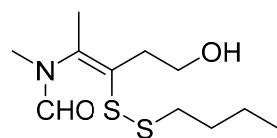

Sample\_id = XD-5c  
 Filename = NMR-2016-00103-4.jdf  
 Creation\_time = 4-DEC-2015 11:06:38  
 Site = ECA400  
 Experiment = single\_pulse.ex2  
 X\_domain = 1H  
 Scans = 8  
 Temp\_get = 18.2[dC]  
 Solvent = CHLOROFORM-D

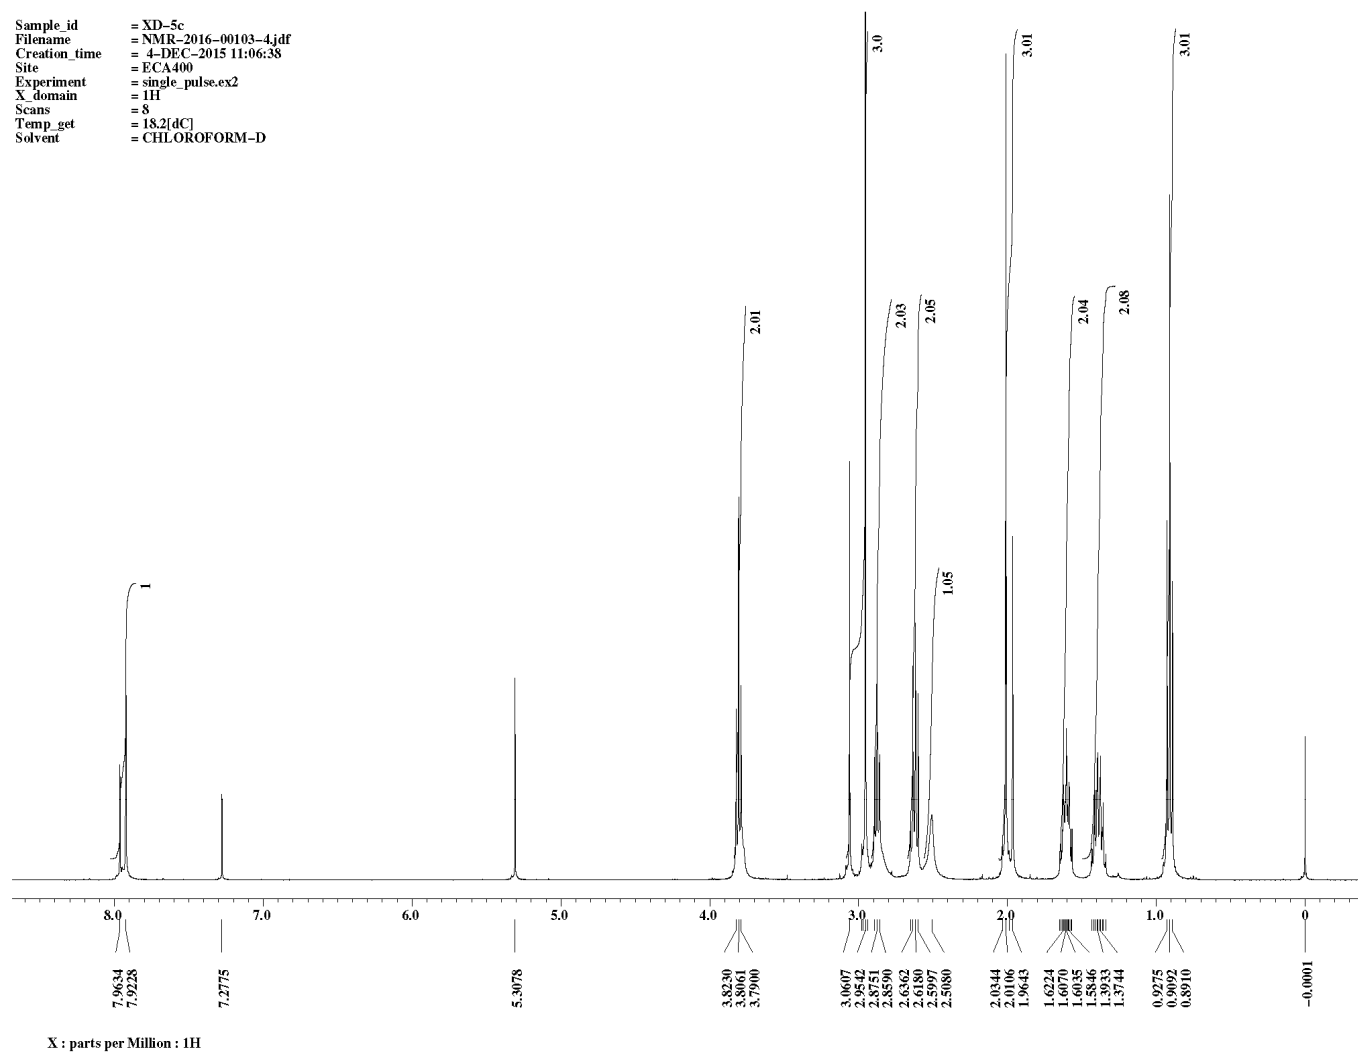

Figure S3. <sup>1</sup>H-NMR spectra of *N*-(3-(butyldisulfanyl)-5-hydroxypent-2-en-2-yl)-*N*-methylformamide 5c (CDCl<sub>3</sub>, 400MHz).

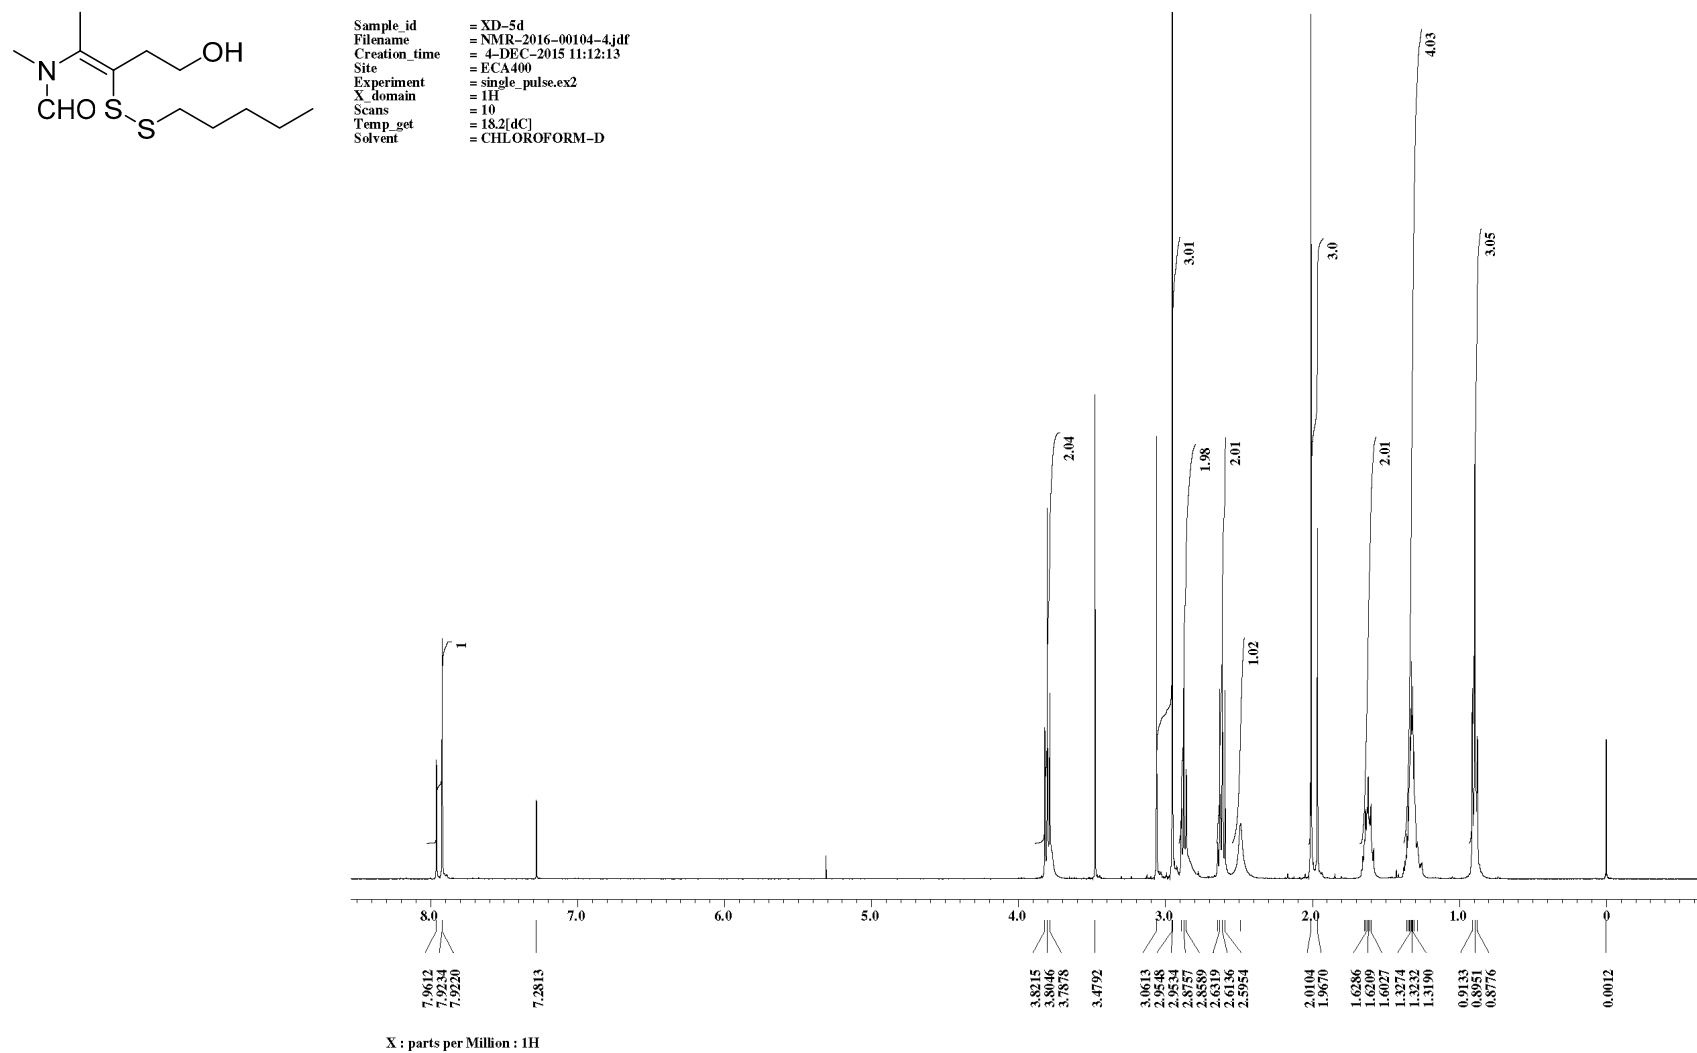

**Figure S4.** <sup>1</sup>H-NMR spectra of *N*-(3-(amyldisulfanyl)-5-hydroxypent-2-en-2-yl)-*N*-methylformamide 5d (CDCl<sub>3</sub>, 400MHz).

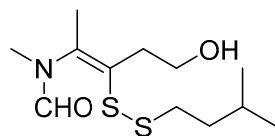

Sample\_id = XD-9-46C  
 Filename = 3146-7.jdf  
 Creation\_time = 22-APR-2014 16:54:48  
 Site = ECA400  
 Experiment = single\_pulse.ex2  
 X\_domain = 1H  
 Scans = 16  
 Temp\_get = 18.9[dC]  
 Solvent = CHLOROFORM-D

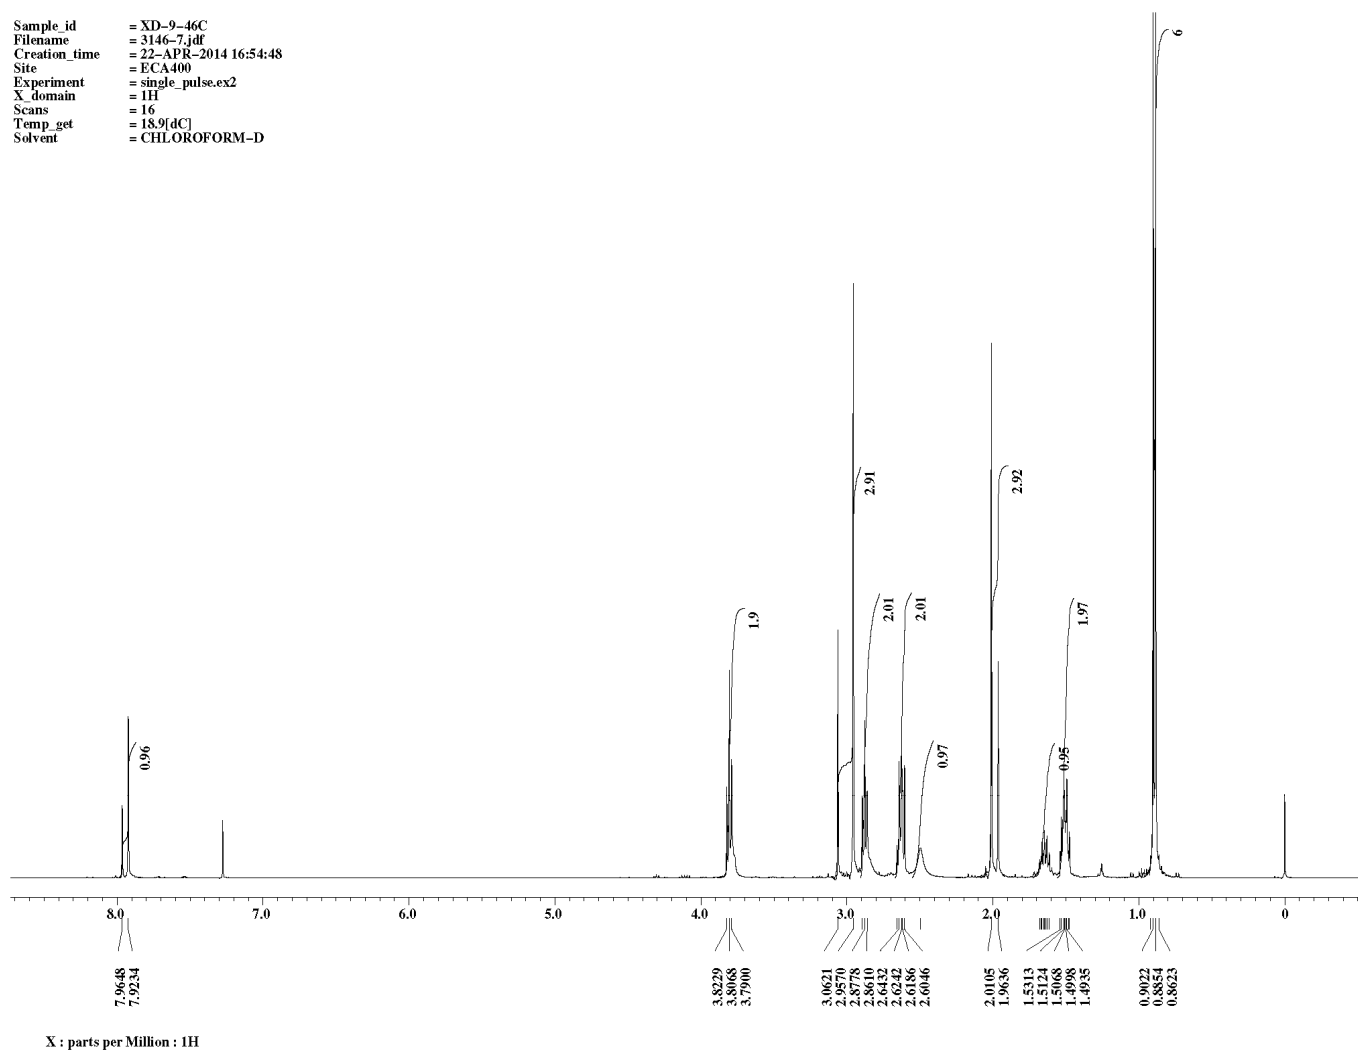

Figure S5. <sup>1</sup>H-NMR spectra of *N*-(3-(isoamyldisulfanyl)-5-hydroxypent-2-en-2-yl)-*N*-methylformamide 5e (CDCl<sub>3</sub>, 400MHz).

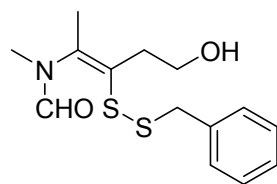

Sample\_id = XD-10-28C  
Filename = 4092-7.jdf  
Creation\_time = 22-MAY-2014 16:50:26  
Site = ECA-400  
Experiment = single\_pulse.ex2  
X\_domain = 1H  
Scans = 12  
Temp\_get = 18.7[dC]  
Solvent = DMSO-D6

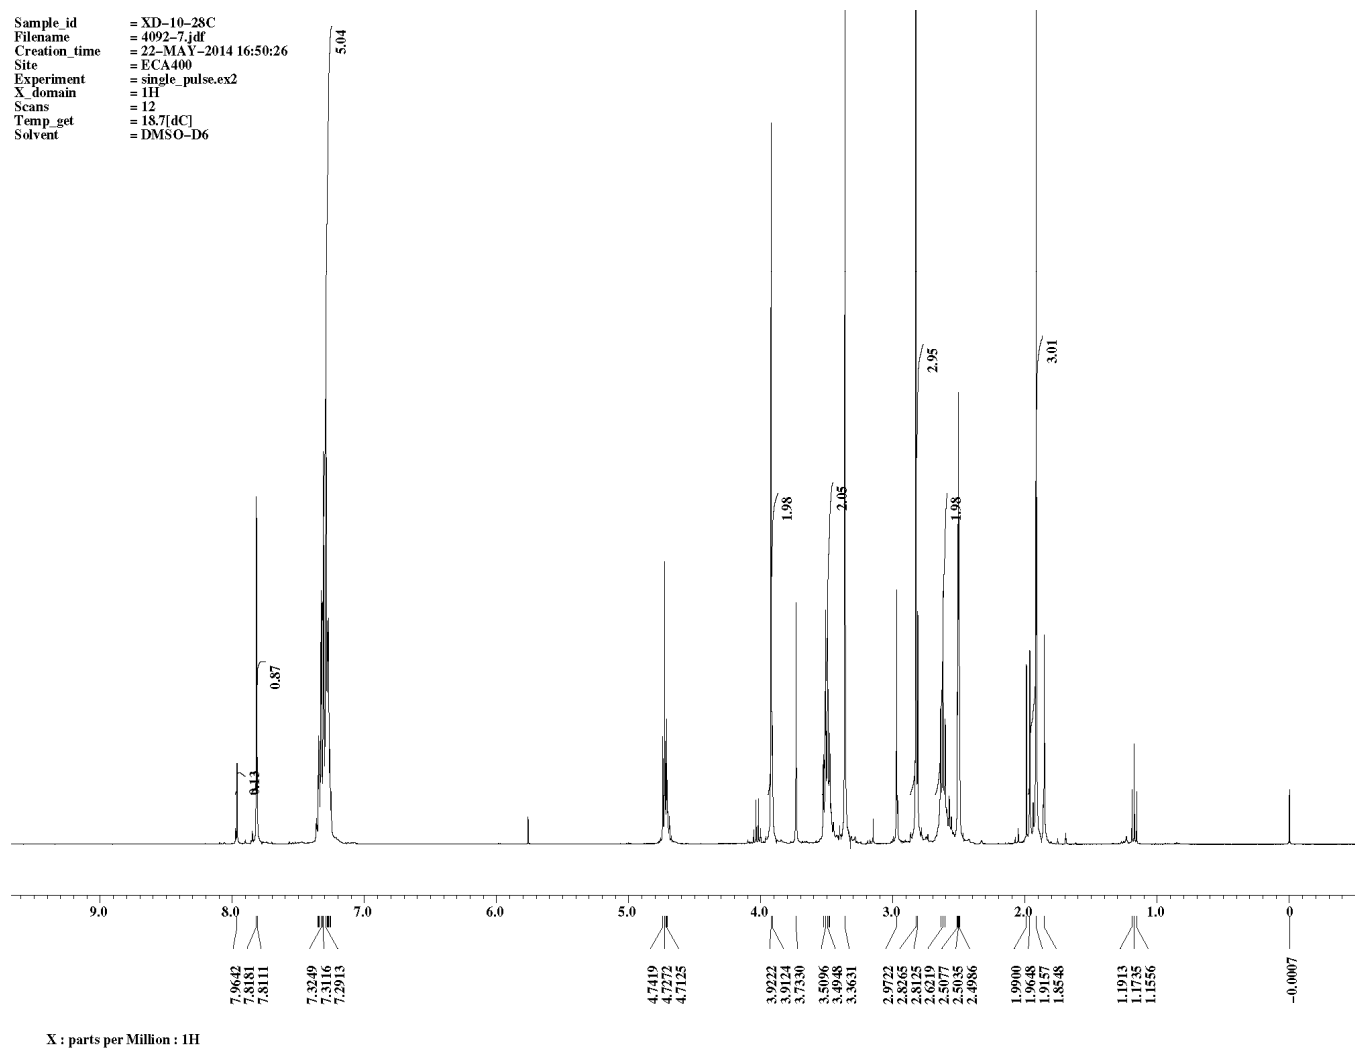

Figure S6. <sup>1</sup>H-NMR spectra of *N*-(3-(benzylsulfanyl)-5-hydroxypent-2-en-2-yl)-*N*-methylformamide 5f (DMSO-*d*<sub>6</sub>, 400MHz).

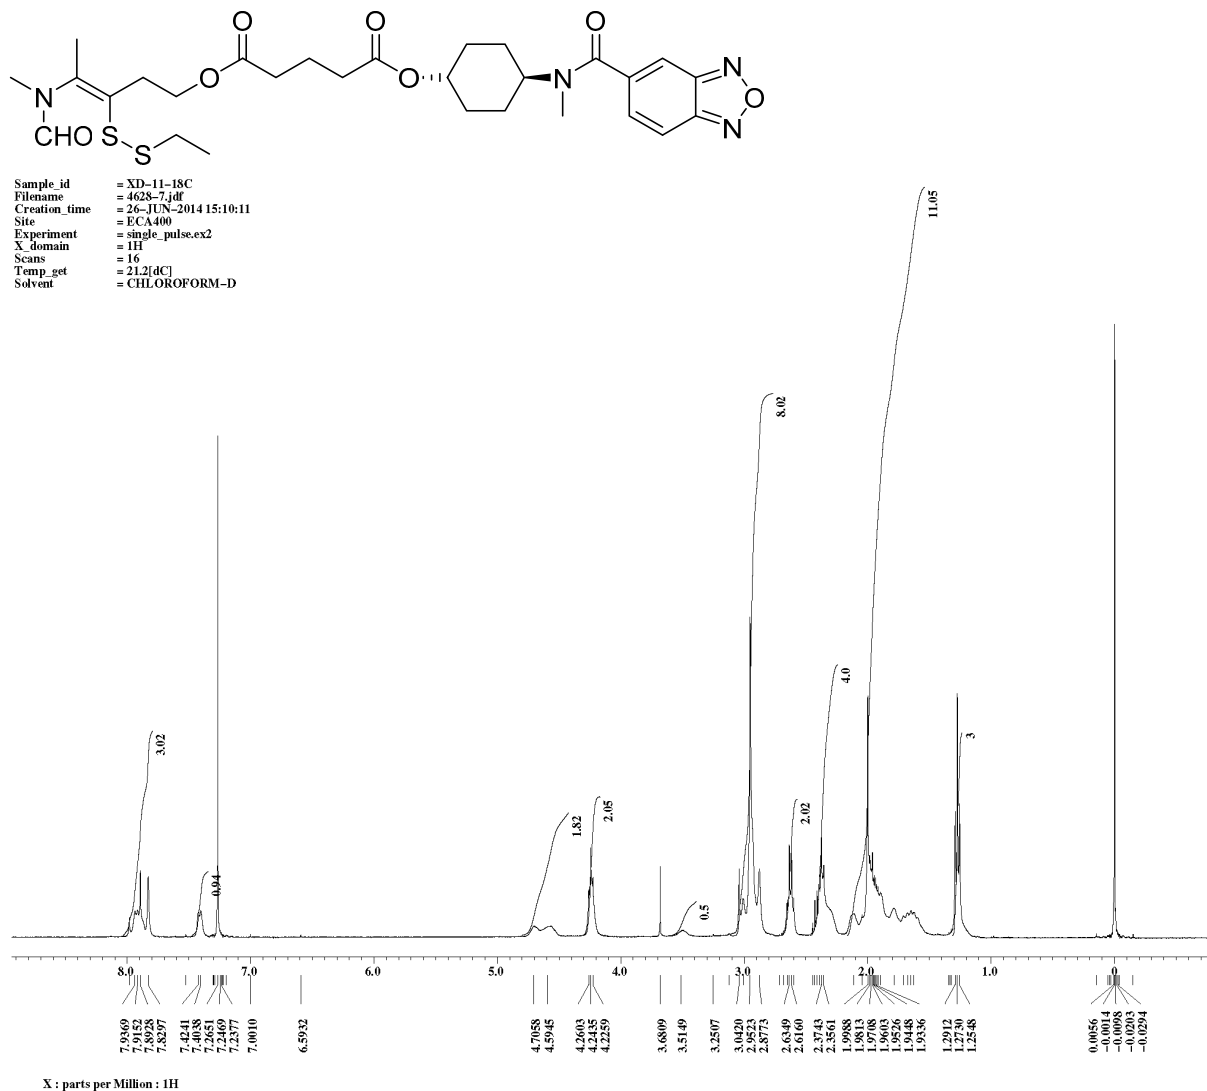

**Figure S7.** <sup>1</sup>H-NMR spectra of S-3-(ethylsulfanyl)-4-(N-methylformamido)pent-3-en-1-yl((1R,4R)-4-(N-methylbenzo[c][1,2,5]oxadiazole-5-carboxamido)cyclohexyl) glutarate (**7a**) (CDCl<sub>3</sub>, 400MHz).

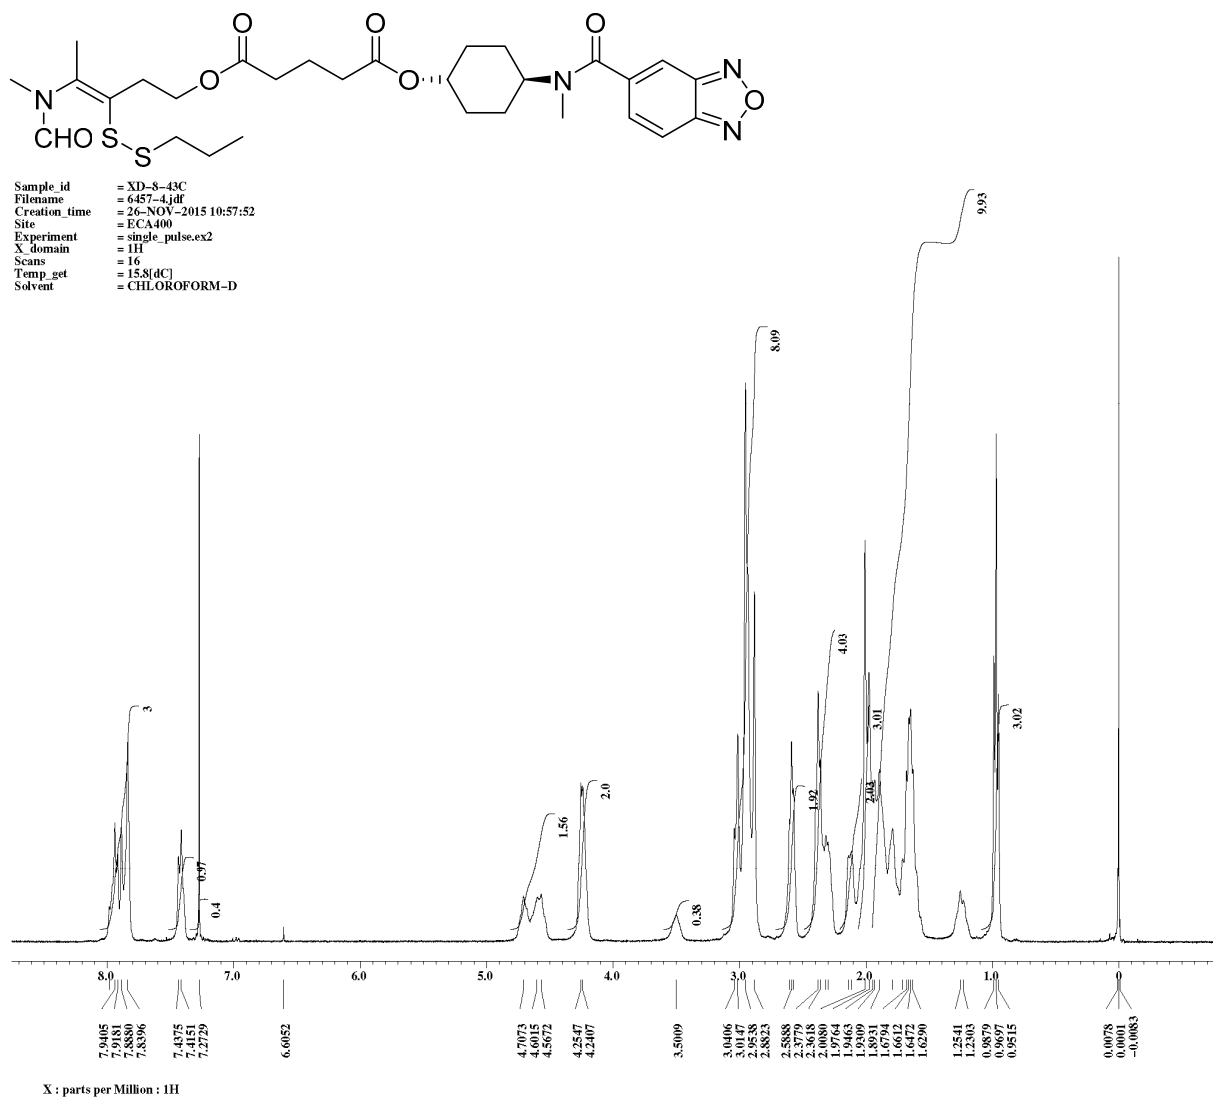

**Figure S8.**  $^1\text{H-NMR}$  spectra of *S*-3-(propyl disulfanyl)-4-(*N*-methylformamido)pent-3-en-1-yl((1*R*,4*R*)-4-(*N*-methylbenzo[*c*][1,2,5]oxadiazol-5-carboxamido)cyclohexyl) glutarate (**7b**) ( $\text{CDCl}_3$ , 400MHz).



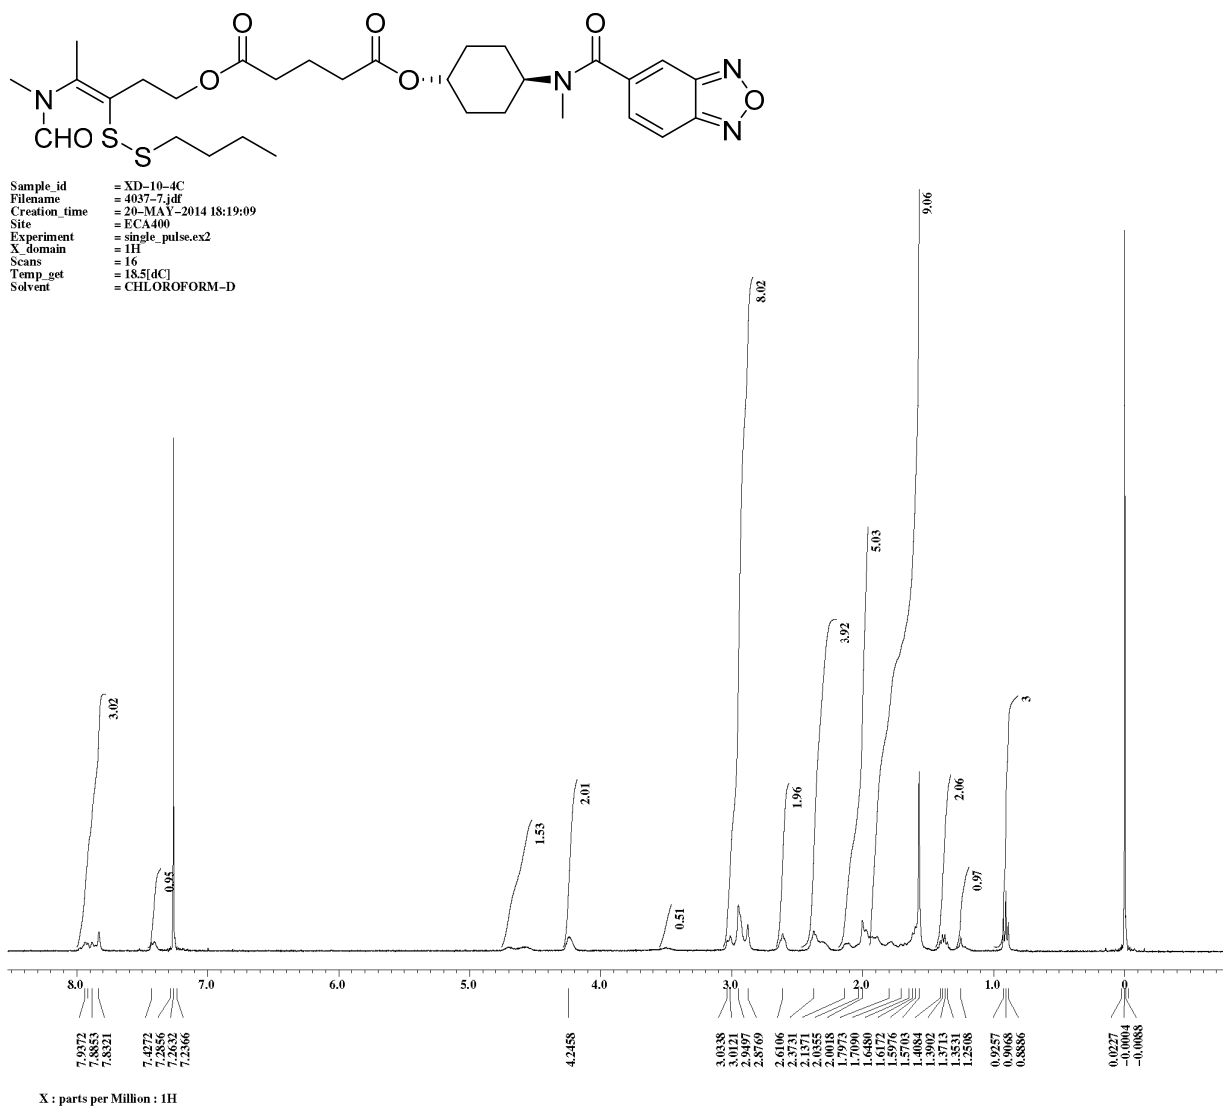

**Figure S9.**  $^1\text{H-NMR}$  spectra of *S*-3-(butyldisulfanyl)-4-(*N*-methylformamido)pent-3-en-1-yl((1*R*,4*R*)-4-(*N*-methylbenzo[*c*][1,2,5]oxadiazole-5-carboxamido)cyclohexyl) glutarate (**7b**) (CDCl<sub>3</sub>, 400MHz).

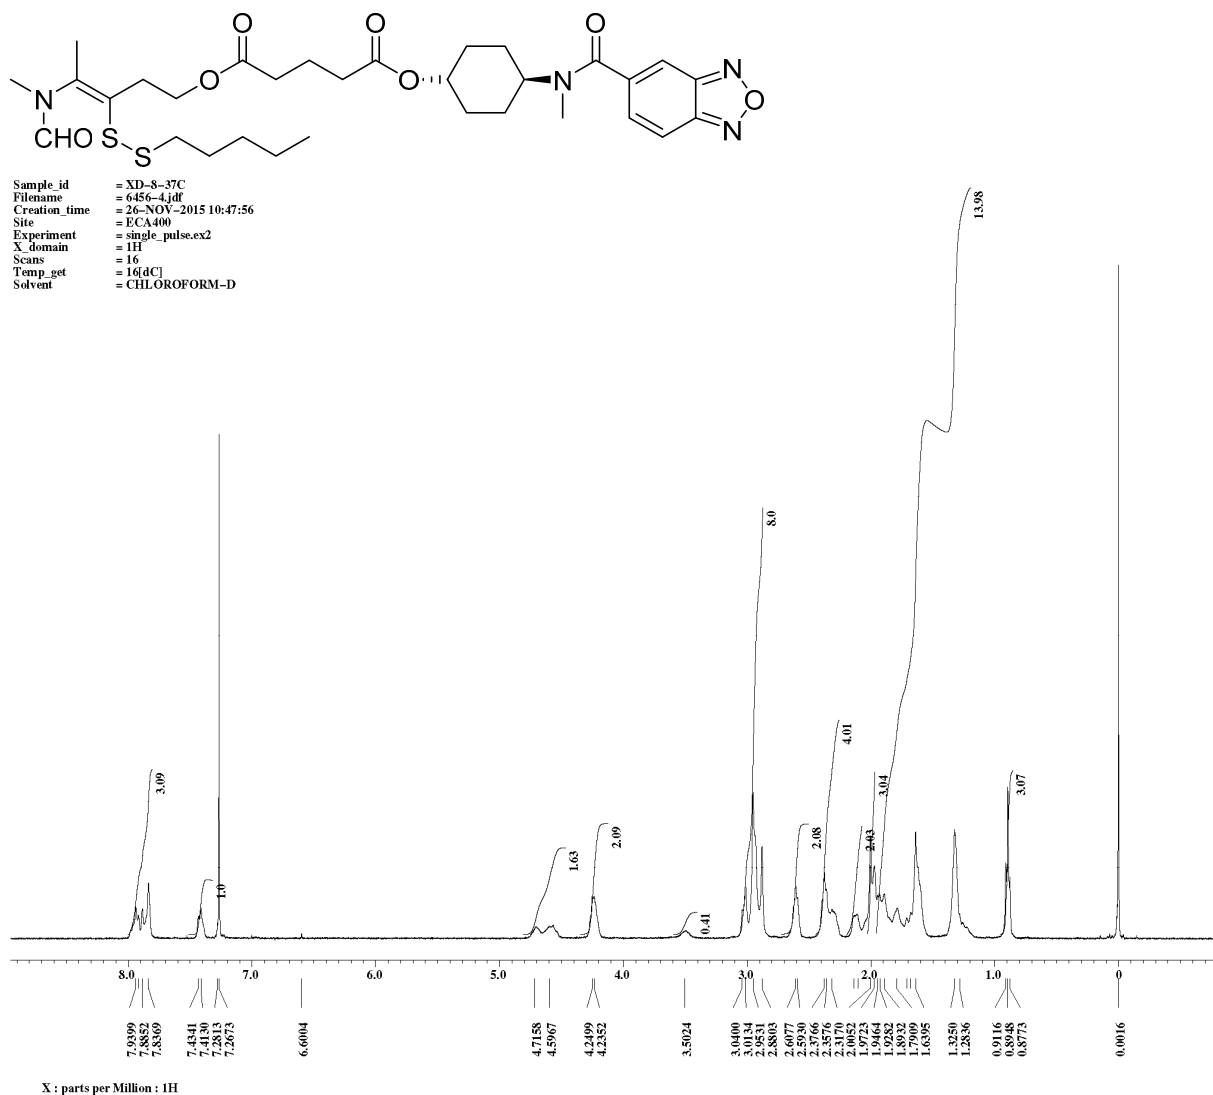

**Figure S10.**  $^1\text{H-NMR}$  spectra of *S*-3-(amyldisulfanyl)-4-(*N*-methylformamido)pent-3-en-1-yl((1*R*,4*R*)-4-(*N*-methylbenzo[*c*][1,2,5]oxadiazole-5-carboxamido)cyclohexyl) glutarate (**7d**) ( $\text{CDCl}_3$ , 400MHz).

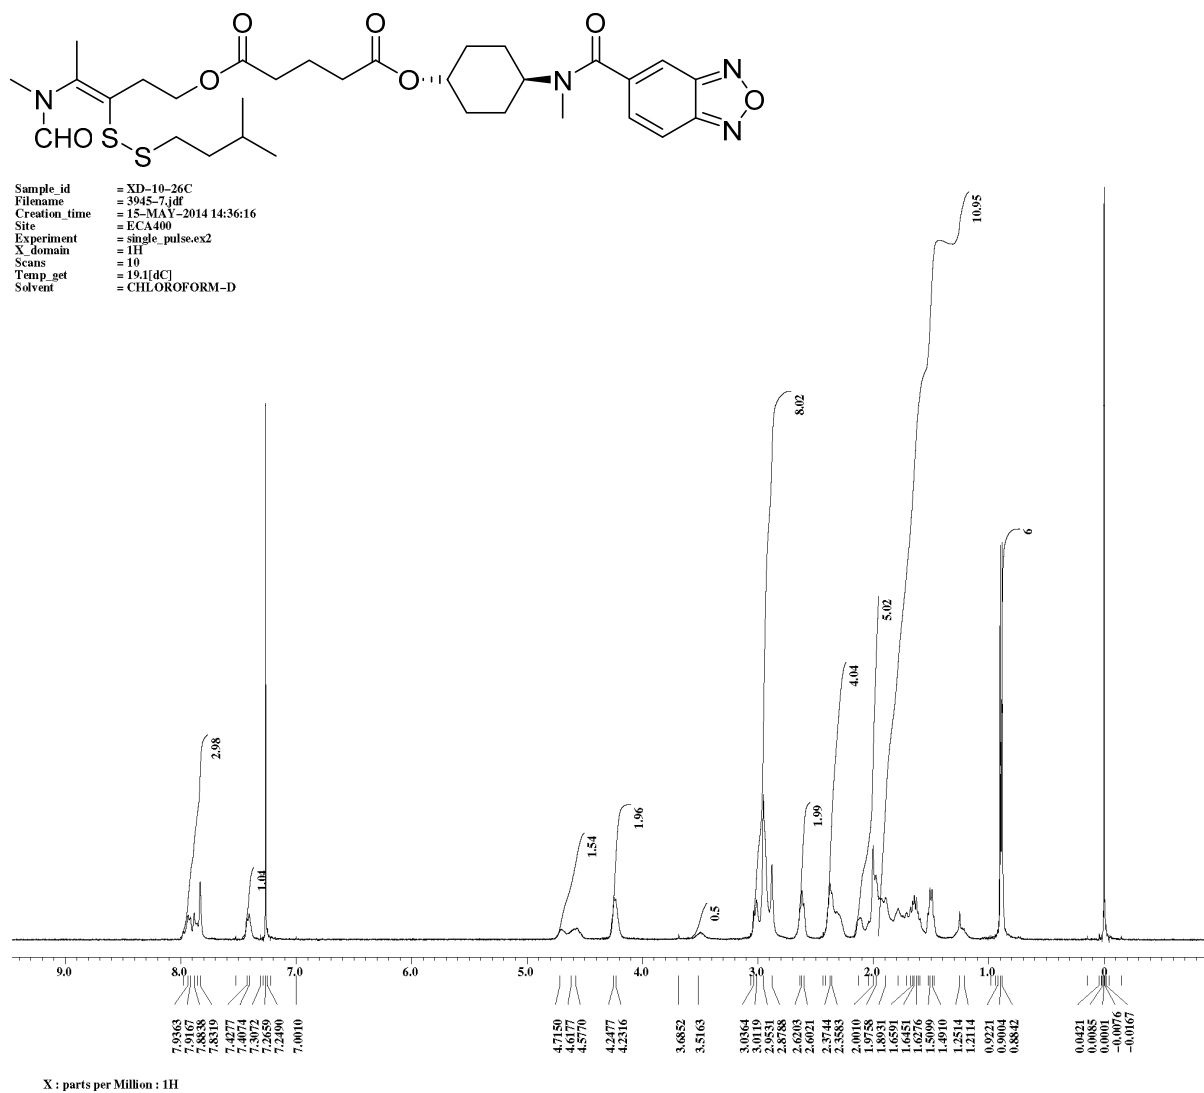

**Figure S11.** <sup>1</sup>H-NMR spectra of S-3-(isoamyldisulfanyl)-4-(N-methylformamido)pent-3-en-1-yl((1R,4R)-4-(N-methylbenzo[c][1,2,5]oxadiazole-5-carboxamido)cyclohexyl) glutarate (**7d**) (CDCl<sub>3</sub>, 400MHz).

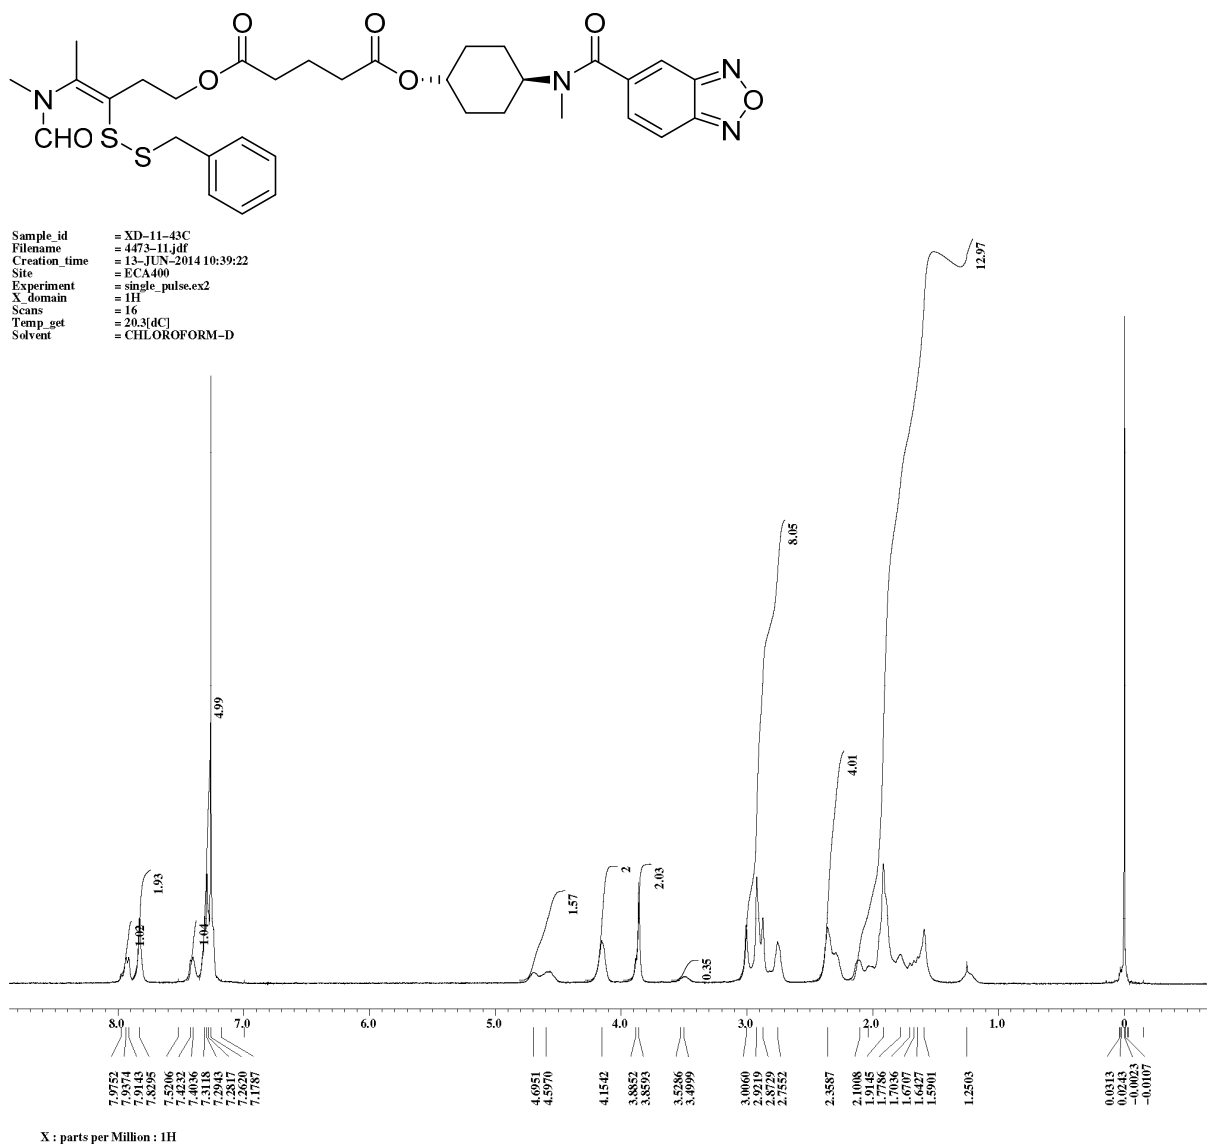

**Figure S12.**  $^1\text{H-NMR}$  spectra of *S*-3-(benzyldisulfanyl)-4-(*N*-methylformamido)pent-3-en-1-yl((1*R*,4*R*)-4-(*N*-methylbenzo[*c*][1,2,5]oxadiazol-5-carboxamido)cyclohexyl) glutarate (**7d**) ( $\text{CDCl}_3$ , 400MHz).
